# Supplementary material for: A magnetic resonance and electrochemical study of the role of polymer mobility in supporting hydrogen transport in perfluorosulfonic acid membranes
Source: Royal Society of Chemistry journal article supplement (doi:10.1039/c8cp02676a), 2018-01-01
Supplement: c8cp02676a1.pdf [file c8cp02676a1.pdf]

**A Magnetic Resonance and Electrochemical Study of the Role of Polymer Mobility in Supporting Hydrogen Transport in Perfluorosulfonic Acid Membranes**

Z. Blossom Yan<sup>a</sup>, Alan P. Young<sup>b</sup>, Gillian R. Goward<sup>a,\*</sup>

- a. Department of Chemistry and Chemical Biology, McMaster University, Hamilton, Ontario, Canada L8S 4M1
- b. Research and Development Division, Ballard Power Systems, Burnaby, British Columbia, Canada V5J 5J8

**Supplemental Information**

### S1: Calculation of H<sub>2</sub> permeability from the crossover current

Based on Faraday's Law:  $I = nFJA$

where  $n$  is the number of electrons transferred in the hydrogen oxidation reaction,  $F$  [C mol<sup>-1</sup>] is the Faraday constant,  $J$  [mol s<sup>-1</sup>m<sup>-2</sup>] is the flux of reactant and  $A$  [m<sup>2</sup>] is the active area.

$$J = \frac{I}{nFA} \quad \left( \text{unit calculation: } \frac{[C/s]}{[C/mol][m^2]} = \frac{mol}{s \cdot m^2} \right)$$
$$\Rightarrow P_{H_2} = \frac{J \cdot d_{PFSA}}{p_{H_2}} \quad \left( \text{unit calculation: } \frac{[\frac{mol}{s \cdot m^2}][m]}{[Pa]} = \frac{mol}{s \cdot m \cdot Pa} \right)$$

where  $P_{H_2}$  is H<sub>2</sub> permeability,  $p_{H_2}$  is the H<sub>2</sub> pressure at the preset conditions,  $d_{PFSA}$  is the thickness of the PFSA membrane.

\*MEA active area is not involved in the calculation because it will be cancelled out during the derivation.

### S2: <sup>19</sup>F DQ NMR pulse sequences and normalization process

#### R264<sup>11</sup> pulse sequence with Bruker Avance III system. Interleaved pseudo 2D experiment.

; PARAMETERS

;-----

;d1 : recycle delay

;d20 : delay b/w presaturation pulses

;l20 : number of presaturation pulses

;p1 : 90 deg pulse (F1)

;p11 : 90 deg pulse power (F1)

;cnst31 : spinning frequency (in Hz)

;l1 : N symmetry number

;l2 : n symmetry number

```

;l3 : nu symmetry number
;p11 : length of R element 90 pulse
;p12 : length of R element 270 pulse
;p111 : R sequence power level (F1)
;l11 : no. pairs of R elements in excitation and reconversion for first slice
;l10 : increment step size for l11 in next slices
;d11 : length of excitation and reconversion periods
;d10 : Z-filter delay
;d31 : rotor period

```

```

; CALCULATIONS

```

```

;-----

```

```

;calculate length of one rotor period

```

```

"d31 = 1.0s/cnst31"

```

```

;calculate length of excitation and reconversion periods

```

```

"d11 = 2*l11*d31*l2/l1"

```

```

;calculate the 90 and 270 pulse lengths for R element

```

```

"p11 = 0.25*d31*l2/l1"

```

```

"p12 = 0.75*d31*l2/l1"

```

```

;calculate the R element phases ( $\phi = \nu/N * \pi$ )

```

```

"cnst1=(180.0*l3)/l1" ; phi

```

```

"cnst2=cnst1+180" ; phi+180

```

```

"cnst3=-1*cnst1" ;-phi

```

```

"cnst4=-1*cnst1+180" ;-phi+180

```

```

"acqt0=-p1/2"

```

```
define loopcounter nfid
"nfid=td1/2"
```

```
; PULSE SEQUENCE
```

```
;-----
```

```
; DQ spectrum (uses ph31 phase list for receiver)
```

```
;-----
```

```
1 ze
```

```
  d11
```

```
  d31
```

```
;PRESATURATION (on F1)
```

```
2 d20
```

```
  (p1 ph20 p11):f1
```

```
  lo to 2 times l20
```

```
;RECYCLE DELAY
```

```
  d1 p11:f1
```

```
;DQ EXCITATION (on F1)
```

```
3 p11 ph11+cnst1
```

```
  p12 ph11+cnst2
```

```
  p11 ph11+cnst3
```

```
  p12 ph11+cnst4
```

```
  lo to 3 times l11
```

```
;DQ RECONVERSION (on F1)
```

```
4 p11 ph12+cnst1
```

```
  p12 ph12+cnst2
```

p11 ph12+cnst3  
p12 ph12+cnst4  
lo to 4 times l11

;Z-FILTER

d10

;OBSERVE PULSE (on F1)

(p1 p11 ph13):f1

;ACQUISITION

go=2 ph31

30m wr #0 if #0 zd ;save data to disk and reset phase lists

; REFERENCE spectrum (uses ph30 phase list for receiver)

;-----

;PRESATURATION (on F1)

12 d20

(p1 ph20 p11):f1

lo to 12 times l20

;RECYCLE DELAY

d1 p111:f1

;DQ EXCITATION (on F1)

13 p11 ph11+cnst1

p12 ph11+cnst2

p11 ph11+cnst3

p12 ph11+cnst4

lo to 13 times l11

;DQ RECONVERSION (on F1)

14 p11 ph12+cnst1

p12 ph12+cnst2

p11 ph12+cnst3

p12 ph12+cnst4

lo to 14 times l11

;Z-FILTER

d10

;OBSERVE PULSE (on F1)

(p1 p11 ph13):f1

;ACQUISITION

go=12 ph30

30m wr #0 if #0 zd ;save data to disk and reset phase lists

;INCREMENT LOOP COUNTER

15 1m iu11

lo to 15 times l10

;LOOP BACK TO BEGINNING

lo to 2 times nfid

exit

;PHASE LISTS

ph20 = 0

ph11 = 0

ph12 = 1 2 3 0

ph13 = 0 0 0 0 1 1 1 1 2 2 2 2 3 3 3 3

ph31 = 0 2 0 2 1 3 1 3 2 0 2 0 3 1 3 1

ph30 = 0 0 0 0 1 1 1 1 2 2 2 2 3 3 3 3

### **Normalization process**

During the pseudo 2D experiment, a reference spectrum (REF) and a double quantum spectrum (DQ) with the same dipolar recoupling time  $\tau_{DQ}$  were collected in an alternating fashion. Please refer to the pulse sequence above.

The normalized double quantum term (nDQ) was calculated based on  $nDQ = DQ / \Sigma MQ$ , where  $\Sigma MQ = DQ + REF$  at each recoupling time. The normalization of the DQ term follows a point-by-point style where absolute signal intensities were used during this process.
